1     **The long-term effects of genomic selection: Response to selection,**  
2                     **additive genetic variance and genetic architecture**

3     Yvonne C.J. Wientjes<sup>\*</sup>, Piter Bijma<sup>\*</sup>, Mario P.L. Calus<sup>\*</sup>, Bas J. Zwaan<sup>†</sup>, Zulma G. Vitezica<sup>‡</sup>,  
4                                     Joost van den Heuvel<sup>†</sup>

5

6     <sup>\*</sup> Wageningen University & Research, Animal Breeding and Genomics, 6700 AH  
7     Wageningen, The Netherlands

8     <sup>†</sup> Wageningen University & Research, Laboratory of Genetics, 6700 AH Wageningen, The  
9     Netherlands

10    <sup>‡</sup> INRAE, INP, UMR 1388 GenPhySE, F-31326 Castanet-Tolosan, France

11

12 Running title: Long-term effects of genomic selection

13 Key words: Genetic architecture, Response to selection, Genetic gain, Non-additive effects,

14 Genetic variance, Genomic selection

15

16 Author information:

17 Yvonne Wientjes

18 Wageningen University & Research

19 Animal Breeding and Genomics

20 P.O. box 338, 6700 AH Wageningen, the Netherlands

21 E-mail: [yvonne.wientjes@wur.nl](mailto:yvonne.wientjes@wur.nl)

22 Phone: +31 317 481 904

23

24

25

26  
27  
28  
29  
30  
31  
32  
33  
34  
35  
36  
37  
38  
39  
40  
41  
42  
43  
44  
45  
46  
47  
48

## ABSTRACT

Genomic selection has revolutionized genetic improvement in animals and plants, but little is known of its long term effects. Here we investigate the long-term effects of genomic selection on the change in the genetic architecture of traits over generations. We defined the genetic architecture as the subset, allele frequencies and statistical additive effects of causal loci. We simulated a livestock population under 50 generations of phenotypic, pedigree, or genomic selection for a single trait, controlled by either only additive, additive and dominance, or additive, dominance and epistatic effects. The simulated epistasis was based on yeast data. The observed change in genetic architecture over generations was similar for genomic and pedigree selection, and slightly smaller for phenotypic selection. Short-term response was highest with genomic selection, while long-term response was highest with phenotypic selection, especially when non-additive effects were present. This was mainly because the loss in genetic variance and in segregating loci was much greater with genomic selection. Compared to pedigree selection, genomic selection lost a similar amount of the genetic variance but maintained more segregating loci, which on average had lower minor allele frequencies. For all selection methods, the presence of epistasis limited the changes in allele frequency and the fixation of causal loci, and substantially changed the statistical additive effects over generations. Our results show that non-additive effects can have a substantial impact on the change in genetic architecture. Therefore, non-additive effects can substantially impact the accuracy and future genetic gain of genomic selection.

49

## INTRODUCTION

50 Animal breeding has substantially increased the performance of livestock populations over  
51 the last century (Hill and Kirkpatrick 2010; Hill 2016). This has been achieved by selecting  
52 the genetically best performing individuals to produce the next generation based on own  
53 performance and/or performances of relatives. Despite the strong selection, these pedigree-  
54 based selection methods have proven to be sustainable; genetic variation and rates of genetic  
55 gain have been stable for many generations in several animal and plant species, both in  
56 commercial breeding programs and experimental selection lines (Beniwal *et al.* 1992; Dudley  
57 and Lambert 2003; Havenstein *et al.* 2003a, b).

58 Recently, genomic selection has revolutionized animal breeding (Meuwissen *et al.* 2001;  
59 Meuwissen *et al.* 2016). Within genomic selection, several thousands of DNA markers  
60 covering the whole genome are used to identify the genetically best animals. In some breeding  
61 programs, genomic selection has doubled the annual rate of genetic gain compared to classical  
62 pedigree selection (Schaeffer 2006; García-Ruiz *et al.* 2016). Arguably, genomic selection  
63 enables selection for low-heritability traits (Calus *et al.* 2008; Wolc *et al.* 2011) and traits that  
64 are difficult or expensive to measure (Goddard and Hayes 2009; Daetwyler *et al.* 2012; Calus  
65 *et al.* 2013), for which classical selection is generally difficult. These properties have resulted  
66 in a rapid uptake of genomic selection in animal breeding programs worldwide (Hayes *et al.*  
67 2009; Knol *et al.* 2016; Meuwissen *et al.* 2016; Wolc *et al.* 2016).

68 The accuracy and, thereby, genetic gain of genomic selection are affected by the genetic  
69 architecture of the traits (Daetwyler *et al.* 2010; Hayes *et al.* 2010; Wientjes *et al.* 2015), that  
70 is the set of causal loci underlying the trait, their frequencies, and their statistical additive  
71 effects. The genetic architecture is largely unknown for most traits, including those under  
72 selection in breeding programmes, but is known to evolve over time as a result of new  
73 mutations and changing allele frequencies due to selection and drift (Wright 1931; Robertson

74 1960; Falconer and Mackay 1996; Hansen *et al.* 2006; Le Rouzic and Carlborg 2008; Hill and  
75 Kirkpatrick 2010; Hill 2016). When interactions are present within (dominance) or between  
76 (epistasis) loci, the statistical additive effects (also known as allele substitution effects)  
77 depend on the allele frequency at the locus itself as well as of those at interacting loci. This  
78 means that part of the functional dominance and epistatic effects contribute to additive genetic  
79 variation, with their total contribution depending on the allele frequencies (Barton and Turelli  
80 2004; Hill *et al.* 2008; Mäki-Tanila and Hill 2014). Although interactions between loci are  
81 known and common (Carlborg and Haley 2004; Carlborg *et al.* 2006; Flint and Mackay 2009;  
82 Huang *et al.* 2012), not much is known about their interaction network or how those  
83 interactions convert into genetic variance components or change over generations as a result  
84 of drift or selection. The genetic interaction network is so far most intensively studied in  
85 yeast, where 90% of the loci associated with a trait were found to be involved in at least one  
86 interaction, with only few interactions for most of the loci, and a lot of interactions for only a  
87 few loci (Tong *et al.* 2004; Boone *et al.* 2007; Costanzo *et al.* 2016). Boone *et al.* (2007) and  
88 Mackay (2014) argue that it is likely that this genetic interaction network is similar in other  
89 species such as livestock and human as well.

90 We hypothesize that genomic selection accelerates the change in genetic architecture of  
91 traits across generations, which can affect long-term genetic gain. The reason is not only that  
92 genomic selection is more effective, but also related to the distribution of the selection  
93 pressure across the genome. Classical selection methods based on pedigree relationships  
94 implicitly weigh effects of alleles independently of allele frequency or effect size and  
95 distribute selection pressure evenly across the genome (Goddard 2009). This is in contrast to  
96 genomic selection methods that put less weight on rare alleles (Goddard 2009; Bijma 2012).  
97 Genomic selection methods, therefore, more strongly select on genomic regions surrounding  
98 loci with a large contribution to the additive genetic variance and may significantly increase

99 the change in allele frequency at those loci (Heidaritabar *et al.* 2014). Therefore, genomic  
100 selection may substantially accelerate the rate of genetic gain in the short-term, but by  
101 ignoring regions with a smaller contribution to additive genetic variance, genomic selection  
102 increases the risk of losing rare favourable alleles or may fail to increase frequency of such  
103 alleles (Jannink 2010; Liu *et al.* 2015; De Beukelaer *et al.* 2017). The loss of rare favourable  
104 alleles reduces genetic variation and genetic gain in the long term (Goddard 2009), and limits  
105 the potential to accommodate changes in desirable phenotypes in the future. However,  
106 currently, these expectations have not been investigated in detail or tested in breeding  
107 populations.

108 Therefore, the aim of this study is to investigate the long-term effects of genomic selection  
109 on the genetic architecture of traits. Using simulations, genomic selection will be compared to  
110 phenotypic and pedigree selection. We will investigate the impact of those selection methods  
111 on the rate of genetic gain, the loss in genetic variance and the change in genetic architecture  
112 for 50 generations of selection. Those results will give us more insight on the long-term  
113 evolution of the genetic architecture and genetic variation of traits under different selection  
114 methods.

115

116

## MATERIALS AND METHODS

117     **Simulated population:** We simulated a livestock population under 50 generations of  
118 selection. As a first step, we constructed a historical population in which selection was absent  
119 and mating was at random, using the QMSim software (Sargolzaei and Schenkel 2009). The  
120 first 2000 generations (generation -3050 to -1050) consisted of 1500 individuals, after which  
121 the size of the population gradually decreased to 100 over 500 generations (generation -1050  
122 to -550) to resemble a bottleneck in the population and to generate linkage disequilibrium.  
123 This was followed by a gradual increase in population size to 1500 over 500 generations  
124 (generation -550 to -50). From the last historical generation (generation -50), 100 females and  
125 100 males were randomly sampled, and their genotypes were the input for our own developed  
126 Fortran program. Those individuals were randomly mated (mating ratio 1:1) with a litter size  
127 of 10 (5 females and 5 males). In each of the next 50 discrete generations, 100 females and  
128 100 males were randomly sampled and mated to build up mutation-drift equilibrium  
129 (generation -50 to 0), using a selected proportion of 0.2. Generation 0 formed the base  
130 population for the 50 generations of selection. In the following generations, we used  
131 truncation selection to select the best 100 females and 100 males that were randomly mated  
132 using a mating ratio of 1:1 and a litter size of 10 (5 females and 5 males), resulting in a  
133 selected proportion of 0.2 for both females and males. Five selection methods were used  
134 which will be explained later.

135     **Genome:** The simulated genome contained 10 chromosomes of 100 cM each. The number  
136 of recombination events per chromosome was sampled from a Poisson distribution with on  
137 average one recombination per chromosome and a random allocation of the recombination  
138 location on the chromosome.

139     In the historical population, 200,000 randomly spaced bi-allelic loci per chromosome were  
140 simulated with a recurrent mutation rate of  $5 * 10^{-5}$ . The population structure and mutation

141 rate resulted in a U-shaped allele frequency distribution of the loci in the historical population.  
142 In the last historical generation, 2000 segregating loci were randomly selected to become  
143 causal loci. Another set of 20,000 segregating loci were selected as marker, by selecting 200  
144 loci from each of 100 equally sized bins based on allele frequency. This resulted in a uniform  
145 allele frequency distribution of the markers, reflecting the ascertainment bias on commercial  
146 marker chips (Matukumalli *et al.* 2009; Ramos *et al.* 2009; Groenen *et al.* 2011).

147 After the historical population, the number of mutations per individual was sampled from a  
148 Poisson distribution with an average of 0.6. This procedure resulted in a mutational variance  
149 of  $\sim 0.001\sigma_e^2$  under our simulated additive model (as explained later), as is often observed in  
150 real populations (Hill 1982; Houle *et al.* 1996; Lynch and Walsh 1998). As loci for the  
151 mutations, we used 4000 loci that did not segregate in the last generation of the historical  
152 population and were randomly sampled from all possible loci. The loci and effects of the  
153 mutations were recycled to limit the computational requirement. In each generation, a locus  
154 was drawn from the potential loci that did not segregate at that moment, while maximizing the  
155 time between two mutations at the same locus. As such, each of the 4000 loci was used on  
156 average once in every 6-7 generations. We believe that recycling the same mutations does not  
157 impact the results of our study, because the vast majority of the mutations are lost in the first  
158 generation due to drift, which is unrelated to their effect.

159 **Genotypic and phenotypic values:** Three genetic models were used to simulate  
160 phenotypic values; a model with only additive effects (A), a model with additive and  
161 dominance effects (AD), and a model with additive, dominance and epistatic effects (ADE).  
162 Functional (or biological) additive and dominance effects were assigned to all 2000 causal  
163 loci and the 4000 loci for mutations in the last historical generation. At the same time,  
164 epistatic effects were assigned to 90% of those loci, as was observed to be the case in yeast  
165 data (Costanzo *et al.* 2016).



166 Functional additive effects ( $a$ ) were sampled from a normal distribution with mean 0 and  
167 standard deviation 1. Functional dominance effects ( $d$ ) were simulated proportional to the  
168 additive effect; we first sampled for each locus a dominance degree ( $dd$ ) from a normal  
169 distribution with mean 0.2 and standard deviation 0.3, and subsequently computed the  
170 dominance effect of locus  $i$  as  $d_i = dd_i |a_i|$ . This resulted in mostly positive dominance  
171 effects, with a bit of overdominance, as was empirically observed in pigs (Bennewitz and  
172 Meuwissen 2010).

173 Only pairwise epistatic effects were simulated, because higher-order interactions have little  
174 effect on the phenotypic values when the allele frequency distribution is U-shaped. The  
175 number of interactions per locus was sampled using the interaction network found between  
176 the ~6000 genes in yeast (Stark 2006; Costanzo *et al.* 2016), with many loci with few  
177 interactions and few loci with many interactions (Figure 1). This was done by creating an  
178 interaction matrix from the network in yeast, with elements of 1 when loci interacted and 0  
179 otherwise. From this matrix, columns and corresponding rows were selected for all loci with  
180 an interaction. For the interaction between locus  $i$  and  $j$ , nine epistatic degrees ( $\varepsilon$ ) were  
181 independently sampled from a normal distribution with mean 0 and standard deviation 0.45,  
182 one for each of the nine possible two-locus genotype combinations. Those  $\varepsilon$  were used to  
183 create nine epistatic effects ( $e$ ) for each interaction as  $e = \varepsilon \sqrt{|a_i a_j|}$  (Table 1), resulting in  
184 larger epistatic effects for loci with a larger additive effect. This way of simulating epistatic  
185 effects resulted in all types of epistasis, i.e., additive by additive, additive by dominance, and  
186 dominance by dominance. However, as a result of simulating the epistatic effects in this  
187 random way, part of the simulated epistatic effect represent a functional additive or  
188 dominance effect (Table 1). For computing functional additive, dominance and epistatic  
189 variance components, we first redistributed the simulated epistatic effects in the correct  
190 underlying functional effects.

191 The functional genetic effects were combined with the genotypes of the individuals to  
 192 calculate total genetic values. For each individual, a residual term was sampled from a normal  
 193 distribution with mean zero and standard deviation equal to the square root of 1.5 times the  
 194 variance in total genetic values in the generation in which functional effects were assigned,  
 195 resulting in a broad sense heritability of 0.4.

196 **Statistical effects:** The natural and orthogonal interaction approach (NOIA) (Álvarez-  
 197 Castro and Carlborg 2007; Vitezica *et al.* 2017) was applied in each generation to compute  
 198 statistical additive and dominance effects based on the functional additive, dominance, and  
 199 epistatic effects of all causal loci (the 2000 segregating causal loci and the 4000 loci for  
 200 mutations) and their allele frequencies (Duenk *et al.* 2020). For each locus  $i$ , the part of the  
 201 dominance effect that is statistically additive was calculated as  $(1 - 2p_i)d_i$ , where  $p_i$  is the  
 202 frequency of the focal allele (i.e., allele A for locus A in Table 1). For each interaction  
 203 between loci  $i$  (with alleles a and A) and  $j$  (with alleles b and B) the functional epistasis is  
 204 converted into statistical additive and statistical dominance effects. These statistical effects  
 205 were computed from three components: 1) a vector  $\mathbf{y}$  with functional epistatic effects,  
 206  $\mathbf{y}' = [e_{00} \ e_{10} \ e_{20} \ e_{01} \ e_{11} \ e_{21} \ e_{02} \ e_{12} \ e_{22}]$ , 2) a 9x9 diagonal matrix  $\mathbf{D}$  with the  
 207 expected frequencies of the two-locus haplotypes, assuming that loci segregate independently,  
 208 and 3) a 9x9 matrix  $\mathbf{W}$  with the mean and orthogonal contrasts for the two loci, constructed as  
 209  $\mathbf{W} = \mathbf{W}_i \otimes \mathbf{W}_j$  with

$$210 \quad \mathbf{W}_i = \begin{bmatrix} 1 & p_{Aa} + 2p_{aa} & \frac{2p_{Aa}p_{aa}}{p_{AA}+p_{aa}-(p_{AA}-p_{aa})^2} \\ 1 & p_{Aa} + 2p_{aa} - 1 & \frac{4p_{AA}p_{aa}}{p_{AA}+p_{aa}-(p_{AA}-p_{aa})^2} \\ 1 & p_{Aa} + 2p_{aa} - 2 & \frac{2p_{AA}p_{Aa}}{p_{AA}+p_{aa}-(p_{AA}-p_{aa})^2} \end{bmatrix}.$$

211 The statistical effects followed from

$$\mathbf{b}_{ij} = [\mu \ \alpha_{ij}^i \ \delta_{ij}^i \ \alpha_{ij}^j \ (\alpha\alpha)_{ij} \ (\delta\alpha)_{ij} \ \delta_{ij}^j \ (\alpha\delta)_{ij} \ (\delta\delta)_{ij}]' = (\mathbf{W}'\mathbf{D}\mathbf{W})^{-1}\mathbf{W}'\mathbf{D}\mathbf{y}$$

212 Note that the NOIA model was run separately for each set of interacting loci thereby only  
 213 considering the functional interaction effects and not the functional additive and dominance  
 214 effects. Therefore  $\alpha_{ij}^i = (p_j - q_j)k + 2p_jq_jm + (1 - 2p_i)(p_j - q_j)l + 2p_jq_j(1 - 2p_i)n$ ,  
 215 and  $\delta_{ij}^i = -(1 - 2p_j)l + 2p_j(1 - p_j)n$ ; where  $k, l, m$  and  $n$  are the additive by additive,  
 216 dominance by additive, additive by dominance and dominance by dominance functional  
 217 epistatic effects (Table 1).

218 The total statistical additive effect of locus  $i$  was calculated as

$$219 \quad \alpha_i = a_i + (1 - 2p_i)d_i + \sum \alpha_{ij}^i,$$

220 and the total statistical dominance effect as

$$221 \quad \delta_i = d_i + \sum \delta_{ij}^i,$$

222 where the summation was taken across all interactions that involved locus  $i$ .

223 The statistical additive effect was used to compute the total additive genetic value (i.e., true  
 224 breeding value) across all loci  $i$  of each individual as  $A = \sum w_{a_i}\alpha_i$ , with

$$225 \quad w_{a_i} = \begin{cases} p_{Aa} + 2p_{aa} \\ p_{Aa} + 2p_{aa} - 1 \\ p_{Aa} + 2p_{aa} - 2 \end{cases} \text{ for genotypes } \begin{cases} AA \\ Aa \\ aa \end{cases}.$$

226 In the same way, the statistical dominance effect was used to compute the total dominance  
 227 deviation across all loci  $i$  of each individual as  $D = \sum w_{d_i}\delta_i$ , with

$$228 \quad w_{d_i} = \begin{cases} \frac{2p_{Aa}p_{aa}}{p_{AA}+p_{aa}-(p_{AA}-p_{aa})^2} \\ \frac{4p_{AA}p_{aa}}{p_{AA}+p_{aa}-(p_{AA}-p_{aa})^2} \\ \frac{2p_{AA}p_{Aa}}{p_{AA}+p_{aa}-(p_{AA}-p_{aa})^2} \end{cases} \text{ for genotypes } \begin{cases} AA \\ Aa \\ aa \end{cases}.$$

229 By definition, the variance in  $A$  across all individuals is the additive genetic variance, and the  
 230 variance in  $D$  across all individuals is the dominance genetic variance. The total genetic  
 231 variance minus the additive and dominance variance is the epistatic variance.

232 **Selection methods:** Five methods were used to select the sires and dams of the next  
 233 generation. As a base line for comparison, the first method randomly selected the parents

234 (RANDOM) and was meant to capture the impact of drift alone. The second method selected  
235 the individuals with the highest phenotypic values to become the parents of the next  
236 generation (MASS). The third method selected individuals with the highest estimated  
237 breeding values using a pedigree Best Linear Unbiased Prediction (BLUP) model that  
238 included own performance information of the selection candidates (PBLUP\_OP). The fourth  
239 and fifth method selected individuals with the highest genomic estimated breeding values  
240 from a genomic BLUP model that either included own performance information of the  
241 selection candidates (GBLUP\_OP) or not (GBLUP\_NoOP).

242 Breeding value estimation for the last three methods was performed using the MTG2  
243 software (Lee and van der Werf 2016). Breeding values were estimated simultaneously with  
244 estimating the variance components, using the phenotypic information of the previous three  
245 generations and for PBLUP\_OP and GBLUP\_OP also phenotypic information of the  
246 generation itself. The PBLUP method used a relationship matrix based on a pedigree that  
247 included all individuals from the generation itself and the previous eight generations. The  
248 GBLUP methods used a relationship matrix based on marker genotypes of the generation  
249 itself and the previous three generations, computed using method 1 of VanRaden (VanRaden  
250 2008) with allele frequencies estimated from the genotype data of those generations. The  
251 model for breeding value estimation included a fixed mean, a random additive genetic effect,  
252 a random litter effect, and a residual. The random litter effect was included to capture the  
253 resemblance between full sibs due to non-additive genetic effects, which could otherwise  
254 create bias in the estimated breeding values. Even though dominance and epistatic effects  
255 were simulated, these were not included in the breeding value estimation model, because  
256 additive models are generally used in breeding programs and only the breeding value is  
257 transmitted to the offspring.

258       **Comparing genetic models and selection methods:** The three genetic models (A, AD  
259 and ADE) and five selection methods were compared based on their accuracy of selection,  
260 phenotypic trend, additive genetic variance, additive genic variance (calculated as the sum of  
261  $2p_i(1-p_i)\alpha_i^2$  across all causal loci  $i$ ), heterozygosity, average minor allele frequency (MAF),  
262 and number of segregating causal loci over the 50 generations of selection. The accuracy of  
263 selection was calculated as the correlation between the true breeding values and estimated  
264 breeding values. For each of the 15 scenarios, 20 replicates were simulated.

265       One of our main aims was to evaluate how fast the genetic architecture of the trait changed  
266 due to selection. The genetic architecture can change because 1) The subset of loci affecting  
267 the trait changes due to new mutations and loci becoming fixed, 2) The allele frequencies of  
268 those loci change, which can result in changes in the proportion of the additive genetic  
269 variance explained by each locus, or 3) The statistical additive effects of the loci change as a  
270 result of allele frequency changes and non-additive effects, which can also change the  
271 proportion of additive genetic variance explained by a locus.

272       We defined three criteria that each reflected one of those mechanisms, namely: 1) The  
273 Jaccard index for the segregating causal loci, 2) The correlation in allele frequencies at those  
274 loci between generations, and 3) The correlation in statistical additive effects at those loci  
275 between generations. For the first criterium, we calculated the Jaccard index (Jaccard 1908)  
276 between generation 0 (before selection) and each of the generations after selection as the  
277 number of overlapping segregating loci divided by the total number of segregating loci in the  
278 two generations. For the second criterium, we calculated the correlation between allele  
279 frequencies of generation 0 and each of the generations after selection, using only the loci that  
280 segregated in generation 0 and remained segregating. For the third criterium, we calculated  
281 the correlation between statistical additive effects of generation 0 with a generation after  
282 selection, again including only loci that remained segregating from generation 0 onwards.

283       **Data availability:** Supplemental file 1, contains the QMSim input file, Fortran programs  
284 and seeds used to select the markers and causal loci, to simulate functional effects and  
285 genotypes and phenotypic values of new generations, and the interaction matrix used to  
286 simulate epistatic effects.

287

288

289

## RESULTS

290     **Properties of simulated population:** The allele frequency distribution of the segregating  
291 causal loci was strongly U-shaped (Supplemental file 2, Figure S2.1) and comparable to the  
292 allele frequency distribution in sequence data of livestock populations (Daetwyler *et al.* 2014;  
293 Eynard *et al.* 2015; Heidaritabar *et al.* 2016; Bolormaa *et al.* 2019). In the RANDOM  
294 scenario, where no selection was performed, the allele frequency pattern remained similar  
295 over generations, indicating that the population was approximately in mutation-drift  
296 equilibrium. Moreover, the linkage disequilibrium pattern in the population (Supplemental  
297 file 2, Figure S2.2) was similar to that found in livestock populations (Andreescu *et al.* 2007;  
298 Badke *et al.* 2012; Veroneze *et al.* 2013). This indicates that the effective population size of  
299 the simulated population was comparable to that in real livestock populations that are in the  
300 range of 40-130 (Welsh *et al.* 2010; Uimari and Tapio 2011; Wientjes *et al.* 2013;  
301 Heidaritabar *et al.* 2014).

302     At the functional level with model ADE, epistasis was abundant and 49% of the variation  
303 in the total genetic value was generated by functional epistatic effects and only 19% by  
304 functional additive effects. However, most of the genetic variance at the statistical level was  
305 additive (62%) or due to dominance (33%), and only 5% was epistatic variance in generation  
306 0, which is reasonably close to results for litter size in pigs (Vitezica *et al.* 2018). The broad-  
307 sense heritability was set to 0.4 for all genetic models, resulting in a narrow-sense heritability  
308 of ~0.25 for model ADE. This heritability was considerably lower than the narrow-sense  
309 heritability of ~0.40 for model A and ~0.38 for model AD. Altogether, those parameters  
310 indicate that the simulated genetic architecture using model ADE could represent the genetic  
311 architecture of a trait in a livestock population.

312     **Accuracy of selection:** In the first generation of selection, the accuracy of selection was  
313 always highest with genomic selection including own performance (GBLUP\_OP) (Figure 2).

314 This accuracy was  $\sim 0.83$  for model A and model AD, and  $\sim 0.72$  for model ADE. This lower  
315 accuracy is a result of the lower narrow-sense heritability for this genetic model. For all  
316 genetic models, the accuracy of the pedigree selection scenario with own performance  
317 (PBLUP\_OP) in generation 1 was  $\sim 0.09$  lower than with GBLUP\_OP, the accuracy of  
318 genomic selection without own performance (GBLUP\_NoOP) was  $\sim 0.13$  lower than with  
319 GBLUP\_OP, and the accuracy of MASS was  $\sim 0.21$  lower than with GBLUP\_OP. As  
320 expected, the accuracy of MASS was equal to the square root of the narrow-sense heritability.

321 Over the generations, the accuracy of selection decreased for all scenarios. The decrease  
322 was largest in the first generations as a result of the Bulmer effect (Bulmer 1971). Thereafter,  
323 the decrease was slightly larger for the genomic selection scenarios (GBLUP\_OP and  
324 GBLUP\_NoOP) compared to PBLUP\_OP and MASS. As a result, differences in accuracy  
325 between the scenarios after 50 generations of selection were smaller than in the first  
326 generation. The accuracy decreased fastest under genetic model ADE, especially for the  
327 genomic selection scenarios. Under this genetic model, the accuracies of PBLUP\_OP, MASS  
328 and GBLUP\_OP were similar after 50 generations of selection.

329 **Genetic gain:** Over generations, the average phenotypic value in the population was  
330 constant for the RANDOM scenario and increased with selection (Figure 3). The rates of  
331 genetic gain in the first generations resembled results for the accuracy, with highest values for  
332 GBLUP\_OP, followed by PBLUP\_OP, GBLUP\_NoOP and finally MASS, and smaller values  
333 when non-additive effects were present. The rate of genetic gain decreased over generations,  
334 but considerably less for MASS than for the other selection methods. Therefore, after 50  
335 generations of selection, MASS outperformed PBLUP\_OP and GBLUP\_NoOP in terms of  
336 accumulated genetic gain under all genetic models, and also outperformed GBLUP\_OP under  
337 model ADE.



338       **Additive genetic and genic variance:** The additive genetic and genic variance were  
339 approximately constant for the RANDOM scenario and decreased with selection (Figure 4).  
340 As expected, the largest drop in additive genetic variance was observed in the first generations  
341 of selection as a result of the Bulmer effect, as also observed for the accuracy of selection. In  
342 the first three generations of selection, genetic variance reduced by more than 20%. The total  
343 drop in genetic variance over 50 generations of selection was more or less similar for  
344 GBLUP\_OP and GBLUP\_NoOP where less than 20% of the initial genetic variance was  
345 maintained under genetic models A and AD. Under model ADE, more genetic variance was  
346 maintained (~24%) after 50 generations of selection. Only slightly more genetic variance  
347 (~25%) was maintained with PBLUP\_OP, for which the loss in genetic variance was  
348 reasonably similar across the three genetic models. With MASS, the loss in genetic variance  
349 was considerably less, and ~40% of the variance was maintained after 50 generations of  
350 selection.

351       The additive genic variance is not affected by transient effects such as the Bulmer effect  
352 (Bulmer 1971). Therefore, the loss in genic variance was smaller than the loss in genetic  
353 variance, especially in the first generations. Except for this difference in the first generations,  
354 the trends in additive genic and genetic variance were very similar.

355       **Number of segregating causal loci:** The number of segregating causal loci decreased as a  
356 result of selection (Figure 5). For PBLUP\_OP, the number of loci decreased fastest with a  
357 reduction of almost 50% over 50 generations of selection. For GBLUP\_OP and  
358 GBLUP\_NoOP the decrease was slightly smaller; 42% for GBLUP\_OP and 40% for  
359 GBLUP\_NoOP. For MASS, the decrease was substantially smaller and the number of loci  
360 decreased by only 20%. The loss in segregating loci was slightly smaller when non-additive  
361 effects were present. Interestingly, the number of segregating loci in generation 50 was lower

362 for PBLUP\_OP than for GBLUP\_OP and GBLUP\_NoOP, while the additive genic variance  
363 was slightly larger for PBLUP\_OP.

364 **Average minor allele frequency at segregating causal loci:** The additive genic variance  
365 depends on the number of segregating causal loci as well as their MAF. In the first  
366 generations of selection, the average MAF of segregating loci increased, especially for  
367 PBLUP\_OP (Figure 6). Thereafter, the average MAF decreased and after 50 generations of  
368 selection, it was below its initial value, with the smallest values for the GBLUP scenarios.  
369 Only under genetic model ADE, the average MAF of PBLUP\_OP and MASS after 50  
370 generations of selection were slightly above the average MAF before selection. The impact of  
371 MASS on the average MAF of segregating loci was very limited. The higher average MAF of  
372 PBLUP\_OP can explain the higher additive genic variance for PBLUP\_OP than for  
373 GBLUP\_OP and GBLUP\_NoOP, even though the number of segregating loci was smaller  
374 (Figure 4 vs 5).

375 **Accumulated heterozygosity:** In a random mating population, the accumulated  
376 heterozygosity depends on the number of segregating causal loci (Figure 5), their average  
377 MAF (Figure 6) and the variation in MAF among loci (Supplemental file 2, Figure S2.3 and  
378 Supplemental file 3). As expected, selection resulted in a decrease in the accumulated  
379 heterozygosity (Figure 7). The reduction in accumulated heterozygosity was similar for  
380 GBLUP\_OP and GBLUP\_NoOP, slightly less for PBLUP\_OP and considerably less for  
381 MASS. Moreover, the accumulated heterozygosity decreased slower when non-additive  
382 effects were present. Thus, the decrease in heterozygosity was lower for pedigree than for  
383 genomic selection, and depended on the genetic model.

384 **Change in genetic architecture:** Over generations, the subset of causal loci underlying  
385 the trait (Figure 8), the allele frequencies of the causal loci (Figure 9), and the statistical  
386 additive effects of the causal loci (Figure 10) changed. The change in the subset of loci was

387 measured by the Jaccard index. Especially in the first generation, the subset of loci changed  
388 considerably, because every generation had approximately 600 new mutations, most of which  
389 were lost immediately. As a result, two consecutive generations already differ in almost 1200  
390 loci. The subset of loci affecting the trait changed considerably with drift (RANDOM), but  
391 the change was amplified by selection. After 50 generations, the average Jaccard index was  
392  $\sim 0.27$  for RANDOM,  $\sim 0.21$  for MASS and between 0.10 and 0.15 for PBLUP\_OP,  
393 GBLUP\_NoOP, and GBLUP\_OP. The Jaccard index was slightly higher with non-additive  
394 effects. Those results indicate that the subset of loci affecting the trait constantly changes over  
395 generations due to new mutations and drift, and that the change is amplified by selection.

396 Selection strongly amplified the change in allele frequencies of loci compared to drift  
397 (Figure 9; Supplemental file 4). Due to drift alone, the correlation between the allele  
398 frequencies of loci segregating in both generation 0 and generation 50 was  $\sim 0.93$   
399 (RANDOM). The change in allele frequencies as a result of selection was largest under model  
400 A, with a correlation between the allele frequencies of generation 0 and 50 of only  $\sim 0.10$  for  
401 GBLUP\_OP, GBLUP\_NoOP and PBLUP\_OP, and of 0.44 for MASS. Those correlations  
402 were slightly higher under model AD. When also epistatic effects were present, the change in  
403 allele frequencies was much smaller, and the correlation was  $\sim 0.28$  after 50 generations of  
404 GBLUP\_OP, GBLUP\_NoOP and PBLUP\_OP, and 0.66 for MASS.

405 As a result of the change in allele frequency, statistical additive effects of the loci changed  
406 when non-additive effects were present (Figure 10; Supplemental file 5). The changes were  
407 quite limited when only additive and dominance effects were present, with a correlation of  
408  $\sim 0.94$  between the statistical additive effects of generation 0 and 50 for all selection methods.  
409 When epistatic effects were also present, this correlation was much lower. After 50  
410 generations, the average correlation was 0.95 for RANDOM, 0.65 for MASS, 0.51 for

411 PBLUP\_OP, 0.47 for GBLUP\_NoOP, and 0.45 for GBLUP\_OP. Within 10 generations of  
412 GBLUP\_OP, GBLUP\_NoOP or PBLUP\_OP, the correlation had already dropped to ~0.90.

413

414

415

## DISCUSSION

416 We investigated the long-term effects of genomic selection on the rate of genetic gain,  
417 additive genetic variance and genetic architecture of traits. Over 50 generations of genomic  
418 selection (GBLUP), the accuracy of selection, the rate of genetic gain, the amount of additive  
419 genetic and genic variation, and the number of segregating causal loci decreased. The same  
420 trends were also observed for phenotypic (MASS) and pedigree (PBLUP) selection, but the  
421 decrease was considerably smaller for MASS and slightly smaller for PBLUP. The main  
422 results of our study are assembled in Table 2, which also mentions the most likely mechanism  
423 underlying the results that will be further explained in this discussion.

424 **Genetic gain:** MASS yielded the lowest initial rate of genetic gain, but the highest rate of  
425 genetic gain after 50 generations (Figure 3). Therefore, MASS outperformed most of the other  
426 selection methods in terms of cumulative genetic gain over 50 generations of selection. Those  
427 results are in agreement with previous research based on the infinitesimal model, which  
428 showed that MASS can outperform PBLUP for long-term gain, even though short-term gain  
429 was highest for PBLUP (Verrier *et al.* 1993; Wei *et al.* 1996). This was mainly because  
430 PBLUP lost more genetic variation (Figure 4) and segregating loci (Figure 5) than MASS.

431 The relative benefit of MASS for cumulative genetic gain over 50 generations was larger  
432 with dominance. The other selection methods that each had a higher initial accuracy than  
433 MASS resulted in selecting more related individuals; the pedigree inbreeding coefficients  
434 after 50 generations was ~2.6 times larger with PBLUP and ~1.8 times larger with GBLUP  
435 than with MASS (Supplemental file 6, Table S6.1). These larger inbreeding coefficients with  
436 PBLUP and GBLUP suggests that those selection methods suffered more from inbreeding  
437 depression than MASS in the presence of dominance. It has been shown previously that with  
438 high rates of inbreeding depression, the long-term genetic gain is higher with MASS than with  
439 PBLUP (Quinton *et al.* 1992).

440 The benefit of MASS in cumulative genetic gain was even larger when also epistasis was  
441 present. This is a result of the increasingly smaller difference in accuracy between selection  
442 methods over generations when epistasis was present than when epistasis was absent, because  
443 the accuracy of GBLUP and PBLUP dropped faster over generations when epistasis was  
444 present (as will be further explained later). The smaller difference in accuracy between  
445 selection methods together with the much higher additive genetic variance in the last  
446 generations for MASS (Figure 4) resulted in a much higher rate of genetic gain for MASS in  
447 those generations compared to the other selection methods.

448 The cumulative genetic gain was always lowest for GBLUP without own performance  
449 records (GBLUP\_NoOP). This selection method, however, allows for a considerable  
450 reduction in the generation interval in some species, because selection can take place at a  
451 younger age before own phenotypic information or progeny information is available. This is  
452 most pronounced in dairy cattle, where the generation interval can be halved (Schaeffer 2006;  
453 García-Ruiz *et al.* 2016). In this study, a potential difference in generation interval was not  
454 taken into account because our focus is on the genetic mechanisms, not on applied breeding  
455 programs.

456 **Genetic variance:** All selection methods resulted in a significant loss in genetic variance  
457 (Figure 4). Part of this loss was transient and a result of the Bulmer effect (Bulmer 1971). The  
458 difference between the genetic and genic variance was, however, reasonably small  
459 (Supplemental file 2, Figure S2.4). This small difference indicates that the largest part of the  
460 loss in genetic variance was a result of allele frequency changes, and thus permanent.

461 Genic variance was lost across all 50 generations of selection and here we investigate the  
462 trends in the different components of the genic variance; number of segregating causal loci  
463 ( $n$ ), average heterozygosity ( $\overline{H_E}$ ), average square of the statistical additive effects ( $\overline{\alpha^2}$ ) and  
464 covariance between heterozygosity and  $\alpha^2$  ( $Cov(H_E, \alpha^2)$ ; Supplemental file 3). In the first 10

465 generations, genic variance was lost due to a considerable drop in the number of segregating  
466 loci, which was slightly counteracted by an increase in  $\overline{H_E}$  at those loci (Supplemental file 6,  
467 Table S6.2). Especially with PBLUP,  $\overline{H_E}$  increased in the first generations of selection. After  
468 generation 10,  $\overline{H_E}$  decreased and was lower after 50 generations than before selection for most  
469 scenarios. In generation 50,  $\overline{H_E}$  was higher for both MASS and PBLUP than for GBLUP.  
470 Moreover, loci with a larger statistical additive effect were more likely to become fixed,  
471 which slightly reduced  $\overline{\alpha^2}$ , especially when epistasis was present. The covariance between  $H_E$   
472 and  $\alpha^2$  was in general close to zero and contributed only little to the genic variance.  
473 Altogether, those results show that after 50 generations of selection, the drop in genic  
474 variance could for the largest part be explained by a reduction in the number of segregating  
475 loci and in  $\overline{H_E}$  at those loci, and for a smaller part by a reduction in  $\overline{\alpha^2}$ .

476 The total loss in genic variance was lowest for MASS, which maintained a much higher  
477 number of segregating loci than PBLUP or GBLUP (Figure 5, Supplemental file 6, Table  
478 S6.2). This is probably because MASS better exploits rare favorable alleles. In GBLUP and  
479 maybe implicitly and for a smaller extent also in PBLUP, the effects of rare alleles are heavily  
480 regressed towards zero because they contribute little to the genetic variance (Goddard 2009;  
481 Gianola 2013). This enlarges the risk of keeping those alleles at low frequency or of losing  
482 them (Jannink 2010; Liu *et al.* 2015; De Beukelaer *et al.* 2017), even though they have the  
483 potential to greatly contribute to the genetic variance and future genetic gain. The number of  
484 rare alleles (MAF < 0.01) that was lost or remained rare during 50 generations of selection  
485 was indeed lower with MASS than with GBLUP and PBLUP (Supplemental file 6, Table  
486 S6.3). Therefore, the shrinkage of effects of rare alleles in PBLUP and GBLUP is the most  
487 likely explanation for losing more rare favorable alleles than with MASS.

488 The total loss in genic variance was comparable for GBLUP and PBLUP. The number of  
489 segregating loci, however, decreased faster with PBLUP, while the average MAF of

490 segregating loci and thereby the heterozygosity level was higher with PBLUP (Figure 6;  
491 Supplemental file 6, Table S6.2). This might be a result of a stronger family selection with  
492 PBLUP, which agrees with the higher pedigree inbreeding level observed with PBLUP  
493 (Supplemental file 6, Table S6.1).

494 We also investigated the impact of this difference beyond the 50 generations we simulated  
495 by estimating for each scenario the theoretical maximum genetic gain that can still be  
496 achieved from generation 50 onwards. This maximum genetic gain would be achieved when  
497 all loci would become fixed for the favourable allele, using the statistical additive effects of  
498 generation 50 (Supplemental file 6, Table S6.4). The maximum genetic gain was on average  
499 7.6% and 6.1% higher for GBLUP with or without own performance compared to PBLUP  
500 with own performance. This suggests that GBLUP is more sustainable for maintaining future  
501 genetic gain than PBLUP.

502 The loss in genic variance was slightly smaller with non-additive effects. With non-  
503 additive effects, the statistical additive effects depend on the allele frequencies (Fisher 1930;  
504 Mackay 2014). Some positive statistical additive effects even changed into negative effects  
505 over generations when epistasis was present (Supplemental file 5), which also changed the  
506 direction of selection. Those changes limited the number of loci that became fixed in the  
507 population, because selection was not constantly focussing on the same alleles or loci across  
508 generations. This resulted in a higher number of segregating loci (Figure 5) and a higher level  
509 of accumulated heterozygosity (Figure 7) after 50 generations of selection when non-additive  
510 effects were present (Supplemental file 6, Table S6.2).

511 **Genetic architecture:** Our initial plan was to quantify the change in genetic architecture  
512 of traits by the genetic correlation between generations. However, this turned out to be very  
513 complex. The genetic correlation is defined as the correlation between the additive genetic  
514 values (i.e., true breeding values) for two traits of the same individual (Bohren *et al.* 1966;



515 Falconer and Mackay 1996). For a genetic correlation between generation 1 and 10, for  
516 example, trait 1 reflects the true breeding value in generation 1 and trait 2 the true breeding  
517 value in generation 10. Due to the change in allele frequencies over generations, the  
518 correlation between generation 1 and 10 would be different when breeding values were  
519 estimated for a set of individuals from generation 1, generation 10, or both generation 1 and  
520 10 (Duenk *et al.* 2020). This means that the genetic correlation between generations depends  
521 on the subset of individuals used for estimating the genetic correlation, and is not influenced  
522 by the change in allele frequencies and subset of loci underlying the trait across generations.  
523 Therefore, we decided to quantify the change in genetic architecture across generations using  
524 three measures based on the underlying mechanisms; the change in subset of loci, allele  
525 frequencies and statistical additive effects.

526 The change in genetic architecture was strongly enhanced by selection, because selection  
527 resulted in a faster changes in the subset of causal loci, in allele frequencies and in statistical  
528 additive effects (Figures 8, 9 and 10). Contrary to our expectation and earlier results  
529 (Heidaritabar *et al.* 2014; Liu *et al.* 2014), the change in genetic architecture was about  
530 similar for GBLUP and PBLUP. This indicates that even though GBLUP focusses more on a  
531 subset of the genome that changes rapidly in allele frequencies while PBLUP spreads the  
532 selection pressure more evenly across the genome, the average change in allele frequencies  
533 was about equal. This was confirmed by the larger variance in the change in allele frequency  
534 at loci for GBLUP than PBLUP (Supplemental file 6, Table S6.5).

535 After five generations of GBLUP and PBLUP, the Jaccard index had already dropped to  
536 0.42, the correlation between allele frequencies was 0.97, and the correlation between  
537 statistical additive effects 0.96 under model ADE. These results were very similar when they  
538 were calculated with generation 5 as reference instead of generation 0 (Supplemental file 2,  
539 Figures S2.5 – S2.7), indicating that the rate of change in genetic architecture was not higher

540 at the start of selection than in later generations. We hypothesized that those changes could  
541 result in changes in true breeding values across generations. Therefore, we estimated the  
542 correlation in true breeding values of individuals from generation 50 for performance in  
543 generation 50 and generations 47 to 49 that were included in the reference population. The  
544 correlation between true breeding values was always  $>0.99$  when only additive or additive  
545 and dominance effects were present, but substantially smaller than 1 ( $\sim 0.95$  with generation  
546 49,  $\sim 0.91$  with generation 48, and  $\sim 0.87$  with generation 47) for the PBLUP and GBLUP  
547 scenarios with epistasis (Table 3). This indicates that even though the correlation in statistical  
548 additive effects was very high between neighboring generations ( $>0.99$ , Figure 10), the  
549 correlation of true breeding values between generations decreased rapidly because statistical  
550 additive effects changed more rapidly for loci with high MAF or large effect (Supplemental  
551 file 5). This phenomenon drastically decreased the informativeness of previous generations  
552 for breeding value prediction. So, recent generations of reference populations for genomic  
553 prediction are more useful, not only because they are closer related to the selection candidates  
554 (Clark *et al.* 2012; Pszczola *et al.* 2012; Wientjes *et al.* 2013), but also because their genetic  
555 architecture is more similar to that in the selection candidates.

556 **Non-additive effects:** The contribution of epistasis to the variation in quantitative traits is  
557 a highly debated topic. The results of our study show that even though almost 50% of the  
558 variation in the total genetic value was generated by functional epistatic effects, the epistatic  
559 genetic variance explained only 5% of the genetic variance. This means that most of the  
560 epistatic effects were captured in the statistical additive effects, which was also expected  
561 based on the U-shaped allele frequency distribution of the loci (Hill *et al.* 2008; Mäki-Tanila  
562 and Hill 2014). So the fact that populations only show a limited amount of statistical epistatic  
563 variance does not prove that the amount of functional epistasis in the population is limited  
564 (Cheverud and Routman 1995; Huang and Mackay 2016).

565 Depending on allele frequencies, a large part of the functional dominance and epistatic  
566 effects can be converted into additive variance (Barton and Turelli 2004; Carlborg *et al.* 2006;  
567 Le Rouzic and Carlborg 2008; Hill 2017). For the model with additive and dominance effects,  
568 96% of the additive genetic variance was a result of functional additive effects before  
569 selection, and roughly all genetic variance after 50 generations of selection (Supplemental file  
570 2, Figure S2.8). When epistatic effects were also present, only 34% of the additive genetic  
571 variance was a result of functional additive effects before selection and roughly 50% after  
572 selection. This shows that the part of the functional dominance and epistatic effects captured  
573 by the statistical additive variance changes across generations due to allele frequency changes.

574 The conversion of non-additive effects into statistical additive effects depends on the allele  
575 frequencies. When allele frequencies are closer to 0 or 1, a larger proportion of the non-  
576 additive effects is converted into statistical additive effects. As a result, a negative correlation  
577 between MAF and the absolute statistical additive effect of a locus existed in our simulations  
578 already before selection, even though functional effects were simulated independently of  
579 allele frequencies (Figure 11). A negative correlation between MAF and the effect size of loci  
580 is often observed in empirical studies (Manolio *et al.* 2009; Marouli *et al.* 2017; Zeng *et al.*  
581 2018), and our results show that the existence of non-additive effects can contribute to  
582 explaining this finding.

583 Little is known about the structure and network of epistatic interactions. We only simulated  
584 pairwise interactions and mimicked the genetic interaction network described in yeast, with  
585 many loci with few interactions and few loci with many interactions. Similar interaction  
586 networks although studied in less detail are found in *C. Elegans* (Lehner *et al.* 2006),  
587 *Drosophila* (Huang *et al.* 2012) and mice (Tyler *et al.* 2017), and are also found between  
588 proteins (Tong *et al.* 2004). Therefore, Boone *et al.* (2007) and Mackay (2014) argue that it is

589 likely that the interaction network between genetic loci is similar in other species such as  
590 livestock and human as well.

591 **Conclusion:** An overview of the main results of this study is shown in Table 2. Our results  
592 show that GBLUP with own performance records resulted in the highest short-term genetic  
593 gain, while long-term gain was highest with MASS. This was mainly a result of a much  
594 higher loss in genetic variance and number of segregating loci with GBLUP. GBLUP without  
595 own performance records showed a slightly higher short-term gain than MASS, but  
596 considerably lower long-term gain. The genetic gain of PBLUP with own performance  
597 records was in between GBLUP with and without own performance records. PBLUP and  
598 GBLUP showed a similar loss in genetic variance, but the underlying mechanism was  
599 different; GBLUP maintained more loci, but with a lower MAF. The maximum genetic gain  
600 that could still be obtained after 50 generations of GBLUP selection was higher, which  
601 suggests that GBLUP better maintains long-term genetic gain than PBLUP. We have also  
602 shown that the change in genetic architecture of traits was strongly amplified by selection,  
603 with larger changes in the subset, allele frequencies and statistical additive effects of loci.  
604 However, in contrast to our hypothesis, the rate of change in genetic architecture was  
605 comparable for genomic and pedigree selection. Moreover, our results show that non-additive  
606 effects were relatively unimportant in the short-term, but they can substantially impact the  
607 accuracy and genetic gain of genomic selection when multiple generations are included in the  
608 reference population.

609

610

## ACKNOWLEDGMENTS

611        This research is supported by the Netherlands Organisation of Scientific Research (NWO;  
612        VENI grant 16774). The use of the HPC cluster has been made possible by CAT-AgroFood  
613        (Shared Research Facilities Wageningen UR).

614

615

616

617

## LITERATURE CITED

618

619 Álvarez-Castro, J. M. and Ö. Carlborg, 2007 A unified model for functional and statistical  
620 epistasis and its application in quantitative trait loci analysis. *Genetics* 176: 1151-1167.

621 Andreescu, C., S. Avendano, S. R. Brown, A. Hassen, S. J. Lamont, *et al.*, 2007 Linkage  
622 disequilibrium in related breeding lines of chickens. *Genetics* 177: 2161-2169.

623 Badke, Y. M., R. O. Bates, C. W. Ernst, C. Schwab and J. P. Steibel, 2012 Estimation of  
624 linkage disequilibrium in four US pig breeds. *BMC Genom.* 13: 24.

625 Barton, N. H. and M. Turelli, 2004 Effects of genetic drift on variance components under a  
626 general model of epistasis. *Evolution* 58: 2111-2132.

627 Beniwal, B., I. Hastings, R. Thompson and W. Hill, 1992 Estimation of changes in genetic  
628 parameters in selected lines of mice using REML with an animal model. 1. Lean mass.  
629 *Heredity* 69: 352-360.

630 Bennewitz, J. and T. H. E. Meuwissen, 2010 The distribution of QTL additive and dominance  
631 effects in porcine F2 crosses. *J. Anim. Breed. Genet.* 127: 171-179.

632 Bijma, P., 2012 Long-term genomic improvement – new challenges for population genetics. *J.*  
633 *Anim. Breed. Genet.* 129: 1-2.

634 Bohren, B. B., W. G. Hill and A. Robertson, 1966 Some observations on asymmetrical  
635 correlated responses to selection. *Genet. Res.* 7: 44-57.

636 Bolormaa, S., A. J. Chamberlain, M. Khansefid, P. Stothard, A. A. Swan, *et al.*, 2019  
637 Accuracy of imputation to whole-genome sequence in sheep. *Genet. Sel. Evol.* 51: 1.

638 Boone, C., H. Bussey and B. J. Andrews, 2007 Exploring genetic interactions and networks  
639 with yeast. *Nat. Rev. Genet.* 8: 437.

640 Bulmer, M. G., 1971 The effect of selection on genetic variability. *Am. Nat.* 105: 201-211.

- 641 Calus, M., Y. De Haas, M. Pszczola and R. Veerkamp, 2013 Predicted accuracy of and  
642 response to genomic selection for new traits in dairy cattle. *Animal* 7: 183-191.
- 643 Calus, M. P. L., T. H. E. Meuwissen, A. P. W. De Roos and R. F. Veerkamp, 2008 Accuracy  
644 of genomic selection using different methods to define haplotypes. *Genetics* 178: 553-561.
- 645 Carlborg, Ö. and C. S. Haley, 2004 Epistasis: too often neglected in complex trait studies?  
646 *Nat. Rev. Genet.* 5: 618-625.
- 647 Carlborg, Ö., L. Jacobsson, P. Ahgren, P. Siegel and L. Andersson, 2006 Epistasis and the  
648 release of genetic variation during long-term selection. *Nat. Genet.* 38: 418-420.
- 649 Cheverud, J. M. and E. J. Routman, 1995 Epistasis and its contribution to genetic variance  
650 components. *Genetics* 139: 1455-1461.
- 651 Clark, S. A., J. M. Hickey, H. D. Daetwyler and J. H. J. Van der Werf, 2012 The importance  
652 of information on relatives for the prediction of genomic breeding values and the  
653 implications for the makeup of reference data sets in livestock breeding schemes. *Genet.*  
654 *Sel. Evol.* 44: 4.
- 655 Costanzo, M., B. VanderSluis, E. N. Koch, A. Baryshnikova, C. Pons, *et al.*, 2016 A global  
656 genetic interaction network maps a wiring diagram of cellular function. *Science* 353:  
657 aaf1420.
- 658 Daetwyler, H. D., R. Pong-Wong, B. Villanueva and J. A. Woolliams, 2010 The impact of  
659 genetic architecture on genome-wide evaluation methods. *Genetics* 185: 1021-1031.
- 660 Daetwyler, H. D., A. A. Swan, J. H. Van Der Werf and B. J. Hayes, 2012 Accuracy of  
661 pedigree and genomic predictions of carcass and novel meat quality traits in multi-breed  
662 sheep data assessed by cross-validation. *Genet. Sel. Evol.* 44: 33.
- 663 Daetwyler, H. D., A. Capitan, H. Pausch, P. Stothard, R. Van Binsbergen, *et al.*, 2014 Whole-  
664 genome sequencing of 234 bulls facilitates mapping of monogenic and complex traits in  
665 cattle. *Nat. Genet.* 46: 858-865.

- 666 De Beukelaer, H., Y. Badke, V. Fack and G. De Meyer, 2017 Moving beyond managing  
667 realized genomic relationship in long-term genomic selection. *Genetics* 206: 1127-1138.
- 668 Dudley, J. W. and R. J. Lambert, 2003 100 generations of selection for oil and protein in corn.  
669 *Plant Breed. Rev.* 24: 79-110.
- 670 Duenk, P., P. Bijma, M. P. L. Calus, Y. C. J. Wientjes and J. H. J. van der Werf, 2020 The  
671 impact of non-additive effects on the genetic correlation between populations. *G3: Genes,*  
672 *Genomes, Genetics* 10: 783.
- 673 Eynard, S. E., J. J. Windig, G. Leroy, R. van Binsbergen and M. P. Calus, 2015 The effect of  
674 rare alleles on estimated genomic relationships from whole genome sequence data. *BMC*  
675 *Genet.* 16: 24.
- 676 Falconer, D. S. and T. F. C. Mackay, 1996 *Introduction to quantitative genetics*. Pearson  
677 Education Limited, Harlow, United Kingdom.
- 678 Fisher, R. A., 1930 *The genetical theory of natural selection*. Oxford University Press,  
679 Oxford, United Kingdom.
- 680 Flint, J. and T. F. C. Mackay, 2009 Genetic architecture of quantitative traits in mice, flies,  
681 and humans. *Genome Res.* 19: 723-733.
- 682 García-Ruiz, A., J. B. Cole, P. M. VanRaden, G. R. Wiggans, F. J. Ruiz-López, *et al.*, 2016  
683 Changes in genetic selection differentials and generation intervals in US Holstein dairy  
684 cattle as a result of genomic selection. *Proc. Natl. Acad. Sci.* 113: E3995-E4004.
- 685 Gianola, D., 2013 Priors in whole-genome regression: The Bayesian alphabet returns.  
686 *Genetics* 194: 573-596.
- 687 Goddard, M. E., 2009 Genomic selection: Prediction of accuracy and maximisation of long  
688 term response. *Genetica* 136: 245-257.
- 689 Goddard, M. E. and B. J. Hayes, 2009 Mapping genes for complex traits in domestic animals  
690 and their use in breeding programmes. *Nat. Rev. Gen.* 10: 381-391.



- 691 Groenen, M. A. M., H.-J. Megens, Y. Zare, W. C. Warren, L. W. Hillier, *et al.*, 2011 The  
692 development and characterization of a 60K SNP chip for chicken. *BMC Genomics* 12: 274.
- 693 Hansen, T. F., J. M. Álvarez-Castro, A. J. R. Carter, J. Hermisson and G. P. Wagner, 2006  
694 Evolution of genetic architecture under directional selection. *Evolution* 60: 1523-1536.
- 695 Havenstein, G. B., P. R. Ferket and M. A. Qureshi, 2003a Growth, livability, and feed  
696 conversion of 1957 versus 2001 broilers when fed representative 1957 and 2001 broiler  
697 diets. *Poult. Sci.* 82: 1500-1508.
- 698 Havenstein, G. B., P. R. Ferket and M. A. Qureshi, 2003b Carcass composition and yield of  
699 1957 versus 2001 broilers when fed representative 1957 and 2001 broiler diets. *Poult. Sci.*  
700 82: 1509-1518.
- 701 Hayes, B. J., P. J. Bowman, A. J. Chamberlain and M. E. Goddard, 2009 Invited review:  
702 Genomic selection in dairy cattle: Progress and challenges. *J. Dairy Sci.* 92: 433-443.
- 703 Hayes, B. J., J. E. Pryce, A. J. Chamberlain, P. J. Bowman and M. E. Goddard, 2010 Genetic  
704 architecture of complex traits and accuracy of genomic prediction: Coat colour, milk-fat  
705 percentage, and type in Holstein cattle as contrasting model traits. *PLoS Genet.* 6:  
706 e1001139.
- 707 Heidaritabar, M., A. Vereijken, W. M. Muir, T. Meuwissen, H. Cheng, *et al.*, 2014 Systematic  
708 differences in the response of genetic variation to pedigree and genome-based selection  
709 methods. *Heredity* 113: 503-513.
- 710 Heidaritabar, M., M. P. L. Calus, H.-J. Megens, A. Vereijken, M. A. M. Groenen, *et al.*, 2016  
711 Accuracy of genomic prediction using imputed whole-genome sequence data in white  
712 layers. *J. Anim. Breed. Genet.* 133: 167-179.
- 713 Hill, W. G., 1982 Predictions of response to artificial selection from new mutations. *Genet.*  
714 *Res. Camb.* 40: 255-278.

- 715 Hill, W. G., M. E. Goddard and P. M. Visscher, 2008 Data and theory point to mainly  
716 additive genetic variance for complex traits. *PLoS Genet.* 4: e1000008.
- 717 Hill, W. G. and M. Kirkpatrick, 2010 What animal breeding has taught us about evolution.  
718 *Annu. Rev. Ecol. Evol. Syst.* 41: 1-19.
- 719 Hill, W. G., 2016 Is continued genetic improvement of livestock sustainable? *Genetics* 202:  
720 877-881.
- 721 Hill, W. G., 2017 “Conversion” of epistatic into additive genetic variance in finite populations  
722 and possible impact on long-term selection response. *J. Anim. Breed. Genet.* 134: 196-201.
- 723 Houle, D., B. Morikawa and M. Lynch, 1996 Comparing mutational variabilities. *Genetics*  
724 143: 1467-1483.
- 725 Huang, W., S. Richards, M. A. Carbone, D. Zhu, R. R. H. Anholt, *et al.*, 2012 Epistasis  
726 dominates the genetic architecture of *Drosophila* quantitative traits. *Proc. Nat. Acad. Sci.*  
727 USA 109: 15553-15559.
- 728 Huang, W. and T. F. C. Mackay, 2016 The genetic architecture of quantitative traits cannot be  
729 inferred from variance component analysis. *PLoS Genet.* 12: e1006421.
- 730 Jaccard, P., 1908 Nouvelles recherches sur la distribution florale. *Bull. Soc. Vaud. Sci. Nat.*  
731 44: 223-270.
- 732 Jannink, J.-L., 2010 Dynamics of long-term genomic selection. *Genet. Sel. Evol.* 42: 35.
- 733 Knol, E. F., B. Nielsen and P. W. Knap, 2016 Genomic selection in commercial pig breeding.  
734 *Anim. Front.* 6: 15-22.
- 735 Le Rouzic, A. and Ö. Carlborg, 2008 Evolutionary potential of hidden genetic variation.  
736 *Trends Ecol. Evol.* 23: 33-37.
- 737 Lee, S. H. and J. H. J. van der Werf, 2016 MTG2: an efficient algorithm for multivariate  
738 linear mixed model analysis based on genomic information. *Bioinformatics* 32: 1420-1422.

- 739 Lehner, B., C. Crombie, J. Tischler, A. Fortunato and A. G. Fraser, 2006 Systematic mapping  
740 of genetic interactions in *Caenorhabditis elegans* identifies common modifiers of diverse  
741 signaling pathways. *Nat. Genet.* 38: 896-903.
- 742 Liu, H., A. C. Sørensen, T. H. Meuwissen and P. Berg, 2014 Allele frequency changes due to  
743 hitch-hiking in genomic selection programs. *Genet. Sel. Evol.* 46: 8.
- 744 Liu, H., T. H. E. Meuwissen, A. C. Sørensen and P. Berg, 2015 Upweighting rare favourable  
745 alleles increases long-term genetic gain in genomic selection programs. *Genet. Sel. Evol.*  
746 47: 19.
- 747 Lynch, M. and B. Walsh, 1998 *Genetics and analysis of quantitative traits*. Sinauer  
748 Sunderland, MA.
- 749 Mackay, T. F. C., 2014 Epistasis and quantitative traits: using model organisms to study gene-  
750 gene interactions. *Nat. Rev. Genet.* 15: 22-33.
- 751 Mäki-Tanila, A. and W. G. Hill, 2014 Influence of gene interaction on complex trait variation  
752 with multilocus models. *Genetics* 198: 355-367.
- 753 Manolio, T. A., F. S. Collins, N. J. Cox, D. B. Goldstein, L. A. Hindorff, *et al.*, 2009 Finding  
754 the missing heritability of complex diseases. *Nature* 461: 747-753.
- 755 Marouli, E., M. Graff, C. Medina-Gomez, K. S. Lo, A. R. Wood, *et al.*, 2017 Rare and low-  
756 frequency coding variants alter human adult height. *Nature* 542: 186-190.
- 757 Matukumalli, L. K., C. T. Lawley, R. D. Schnabel, J. F. Taylor, M. F. Allan, *et al.*, 2009  
758 Development and characterization of a high density SNP genotyping assay for cattle. *PLoS*  
759 *ONE* 4: e5350.
- 760 Meuwissen, T., B. Hayes and M. Goddard, 2016 Genomic selection: A paradigm shift in  
761 animal breeding. *Anim. Front.* 6: 6-14.
- 762 Meuwissen, T. H. E., B. J. Hayes and M. E. Goddard, 2001 Prediction of total genetic value  
763 using genome-wide dense marker maps. *Genetics* 157: 1819-1829.

- 764 Pszczola, M., T. Strabel, H. A. Mulder and M. P. L. Calus, 2012 Reliability of direct genomic  
765 values for animals with different relationships within and to the reference population. *J.*  
766 *Dairy Sci.* 95: 389-400.
- 767 Quinton, M., C. Smith and M. Goddard, 1992 Comparison of selection methods at the same  
768 level of inbreeding. *J. Anim. Sci.* 70: 1060-1067.
- 769 Ramos, A. M., R. P. M. A. Crooijmans, N. A. Affara, A. J. Amaral, A. L. Archibald, *et al.*,  
770 2009 Design of a high density SNP genotyping assay in the pig using SNPs identified and  
771 characterized by next generation sequencing technology. *PLoS ONE* 4: e6524.
- 772 Robertson, A., 1960 A theory of limits in artificial selection. *Proc. R. Soc. Lond. Ser. B* 153:  
773 234-249.
- 774 Sargolzaei, M. and F. S. Schenkel, 2009 QMSim: a large-scale genome simulator for  
775 livestock. *Bioinformatics* 25: 680-681.
- 776 Schaeffer, L., 2006 Strategy for applying genome-wide selection in dairy cattle. *J. Anim.*  
777 *Breed. Genet.* 123: 218-223.
- 778 Stark, C., 2006 BioGRID: a general repository for interaction datasets. *Nucleic Acids Res.* 34:  
779 D535-D539.
- 780 Tong, A. H. Y., G. Lesage, G. D. Bader, H. Ding, H. Xu, *et al.*, 2004 Global mapping of the  
781 yeast genetic interaction network. *Science* 303: 808-813.
- 782 Tyler, A. L., B. Ji, D. M. Gatti, S. C. Munger, G. A. Churchill, *et al.*, 2017 Epistatic networks  
783 jointly influence phenotypes related to metabolic disease and gene expression in diversity  
784 outbred mice. *Genetics* 206: 621-639.
- 785 Uimari, P. and M. Tapio, 2011 Extent of linkage disequilibrium and effective population size  
786 in Finnish Landrace and Finnish Yorkshire pig breeds. *J. Anim. Sci.* 89: 609-614.
- 787 VanRaden, P. M., 2008 Efficient methods to compute genomic predictions. *J. Dairy Sci.* 91:  
788 4414-4423.

- 789 Veroneze, R., P. S. Lopes, S. E. F. Guimarães, F. F. Silva, M. S. Lopes, *et al.*, 2013 Linkage  
790 disequilibrium and haplotype block structure in six commercial pig lines. *J. Anim. Sci.* 91:  
791 3493-3501.
- 792 Verrier, E., J. Colleau and J. Foulley, 1993 Long-term effects of selection based on the animal  
793 model BLUP in a finite population. *Theor. Appl. Genet.* 87: 446-454.
- 794 Vitezica, Z. G., A. Legarra, M. A. Toro and L. Varona, 2017 Orthogonal estimates of  
795 variances for additive, dominance and epistatic effects in populations. *Genetics* 206: 1297-  
796 1307.
- 797 Vitezica, Z. G., A. Reverter, W. Herring and A. Legarra, 2018 Dominance and epistatic  
798 genetic variances for litter size in pigs using genomic models. *Genet. Sel. Evol.* 50: 71.
- 799 Wei, M., A. Caballero and W. G. Hill, 1996 Selection response in finite populations. *Genetics*  
800 144: 1961-1974.
- 801 Welsh, C. S., T. S. Stewart, C. Schwab and H. D. Blackburn, 2010 Pedigree analysis of 5  
802 swine breeds in the United States and the implications for genetic conservation<sup>1</sup>. *J. Anim.*  
803 *Sci.* 88: 1610-1618.
- 804 Wientjes, Y. C. J., R. F. Veerkamp and M. P. L. Calus, 2013 The effect of linkage  
805 disequilibrium and family relationships on the reliability of genomic prediction. *Genetics*  
806 193: 621-631.
- 807 Wientjes, Y. C. J., M. P. L. Calus, M. E. Goddard and B. J. Hayes, 2015 Impact of QTL  
808 properties on the accuracy of multi-breed genomic prediction. *Genet. Sel. Evol.* 47: 42.
- 809 Wolc, A., C. Stricker, J. Arango, P. Settar, J. E. Fulton, *et al.*, 2011 Breeding value prediction  
810 for production traits in layer chickens using pedigree or genomic relationships in a reduced  
811 animal model. *Genet. Sel. Evol.* 43: 5.
- 812 Wolc, A., A. Kranis, J. Arango, P. Settar, J. E. Fulton, *et al.*, 2016 Implementation of genomic  
813 selection in the poultry industry. *Anim. Front.* 6: 23-31.

- 814 Wright, S., 1931 Evolution in Mendelian populations. *Genetics* 16: 97-159.
- 815 Zeng, J., R. de Vlaming, Y. Wu, M. R. Robinson, L. R. Lloyd-Jones, *et al.*, 2018 Signatures  
816 of negative selection in the genetic architecture of human complex traits. *Nat. Genet.* 50:  
817 746-753.
- 818
- 819

820

## FIGURES

821

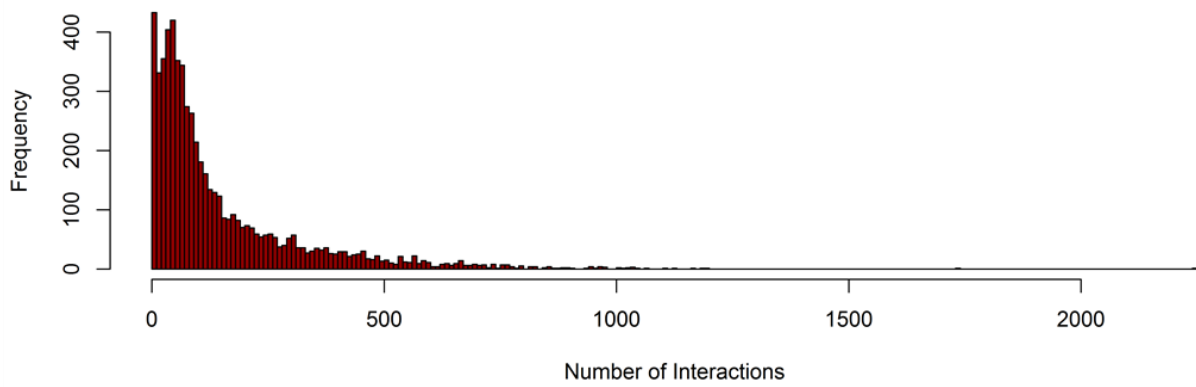

822

### 823 **FIGURE 1**

824 Histogram of the number of interactions per causal locus.

825

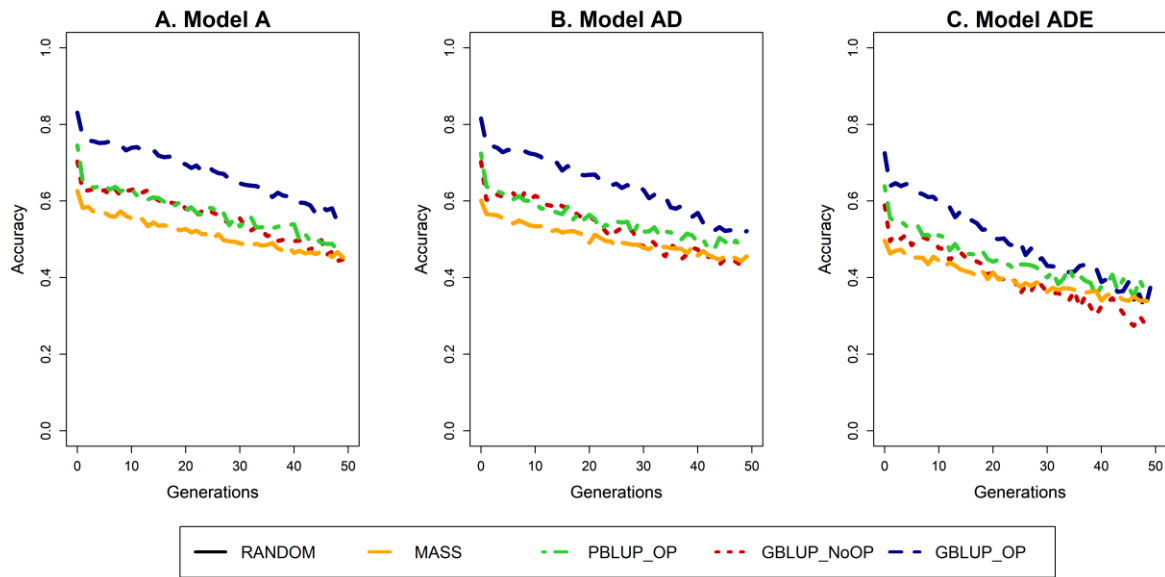



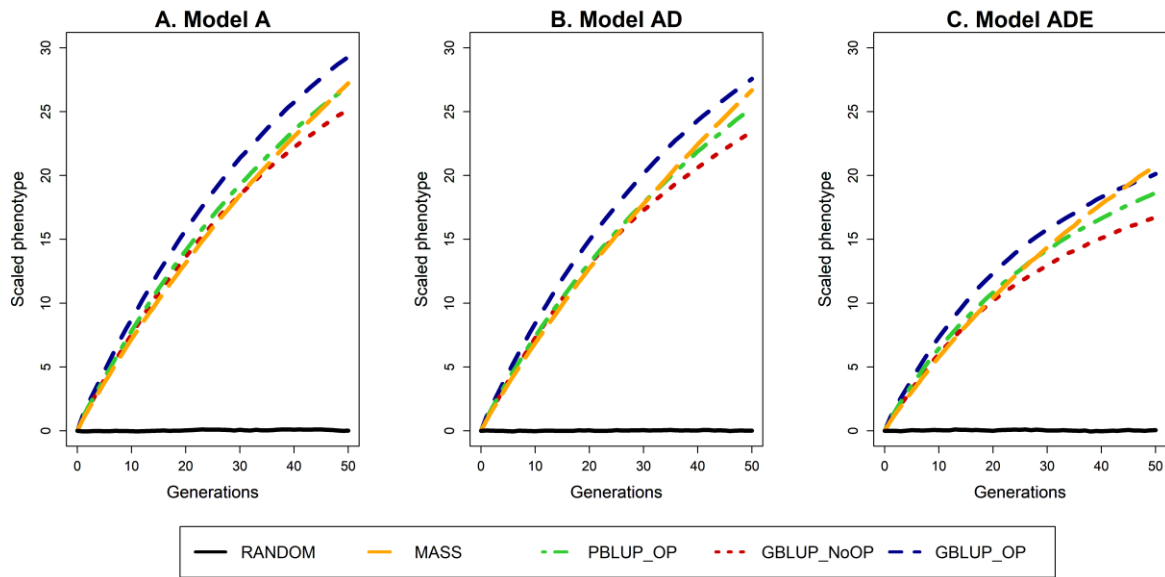

## Additive genetic variance

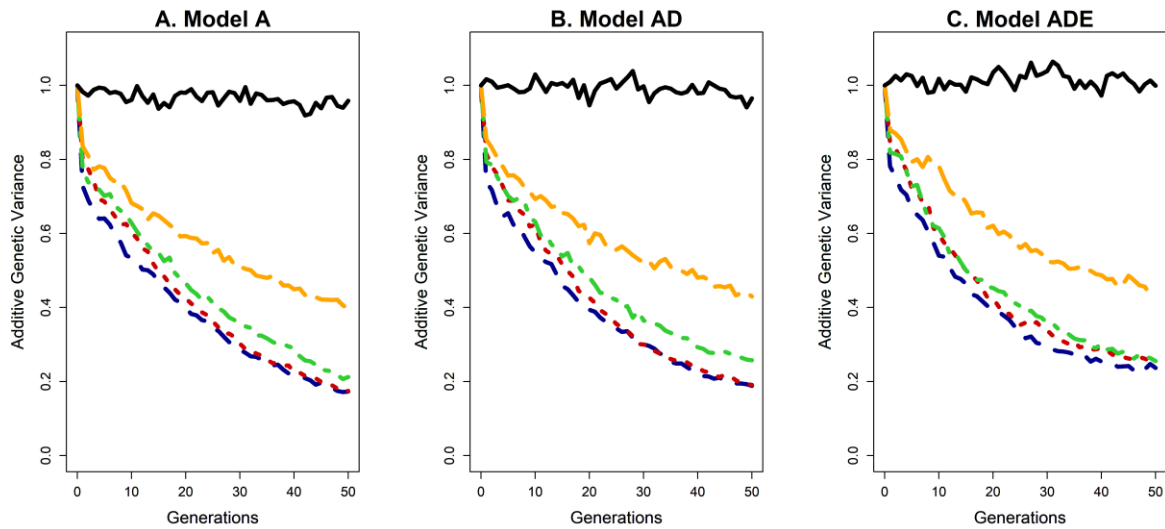

## Additive genic variance

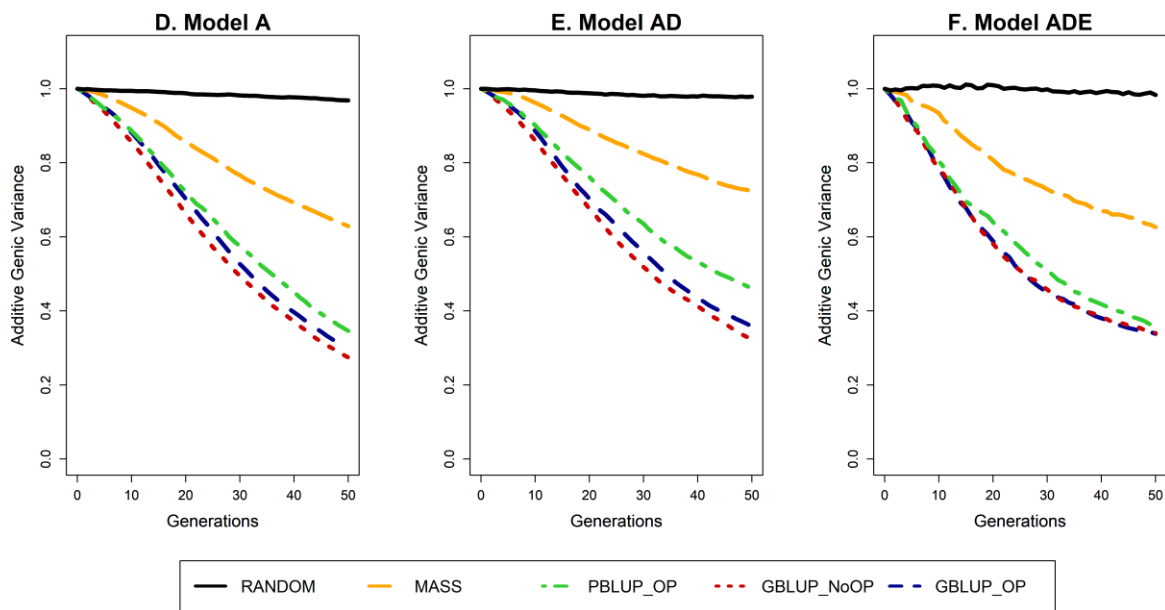

848  
849 **FIGURE 4**

850 Trend in additive genetic (A, B, C) and additive genic (D, E, F) variance for the five selection  
851 methods and three genetic models. The trend is scaled by the additive genetic or additive  
852 genic variance in the generation before selection in order to make the results comparable  
853 across the genetic models. The five selection methods were: RANDOM selection, MASS  
854 selection, PBLUP selection with own performance (PBLUP\_OP), GBLUP selection without  
855 own performance (GBLUP\_NoOP) or with own performance (GBLUP\_OP). The three

856 genetic models were a model with only additive effects (A), with additive and dominance  
857 effects (AD), or with additive, dominance and epistatic effects (ADE). Results are shown as  
858 averages of 20 replicates.

859

860

861

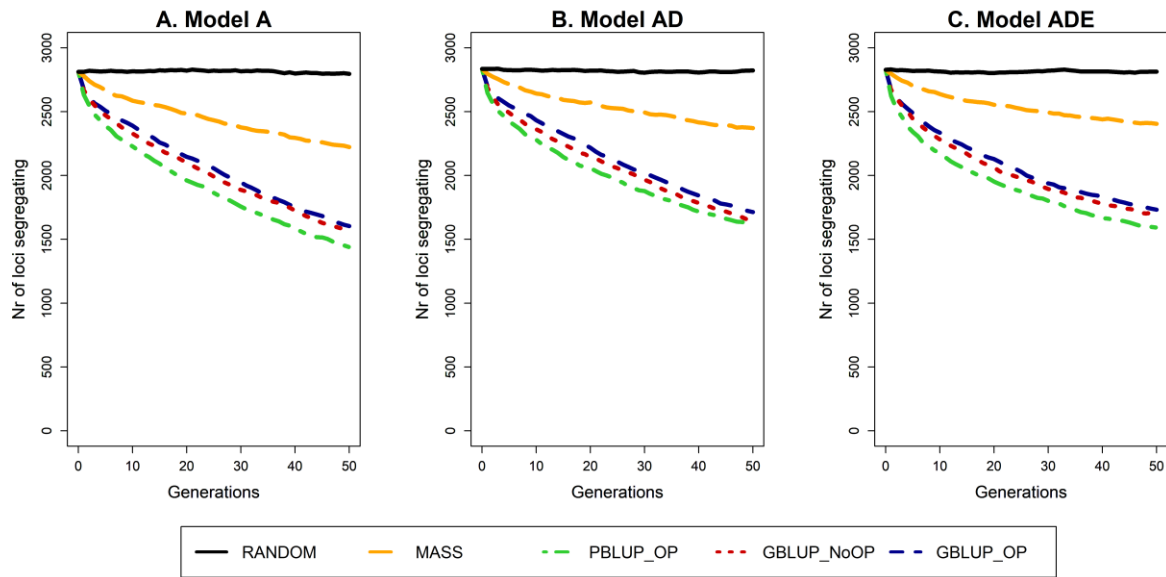

862  
863 **FIGURE 5**

864 Trend in number of segregating causal loci for the five selection methods and three genetic  
865 models. The five selection methods were: RANDOM selection, MASS selection, PBLUP  
866 selection with own performance (PBLUP\_OP), GBLUP selection without own performance  
867 (GBLUP\_NoOP) or with own performance (GBLUP\_OP). The three genetic models were a  
868 model with only additive effects (A), with additive and dominance effects (AD), or with  
869 additive, dominance and epistatic effects (ADE). Results are shown as averages of 20  
870 replicates.

871

872

873

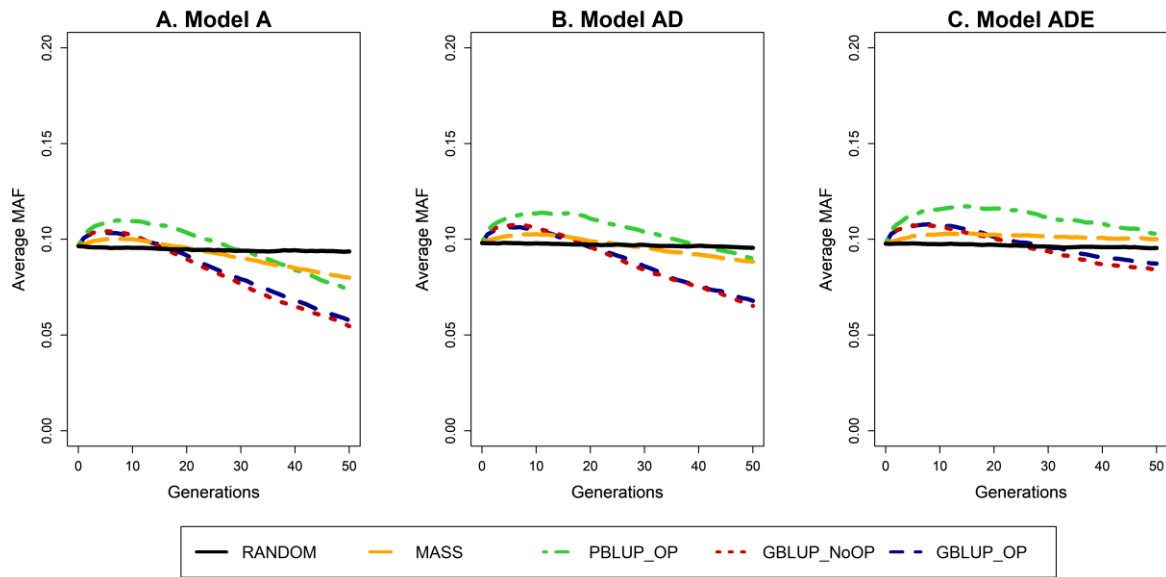

874  
875 **FIGURE 6**

876 Trend in average minor allele frequency (MAF) of segregating causal loci for the five  
877 selection methods and three genetic models. The five selection methods were: RANDOM  
878 selection, MASS selection, PBLUP selection with own performance (PBLUP\_OP), GBLUP  
879 selection without own performance (GBLUP\_NoOP) or with own performance  
880 (GBLUP\_OP). The three genetic models were a model with only additive effects (A), with  
881 additive and dominance effects (AD), or with additive, dominance and epistatic effects  
882 (ADE). Results are shown as averages of 20 replicates.

883

884

885

886

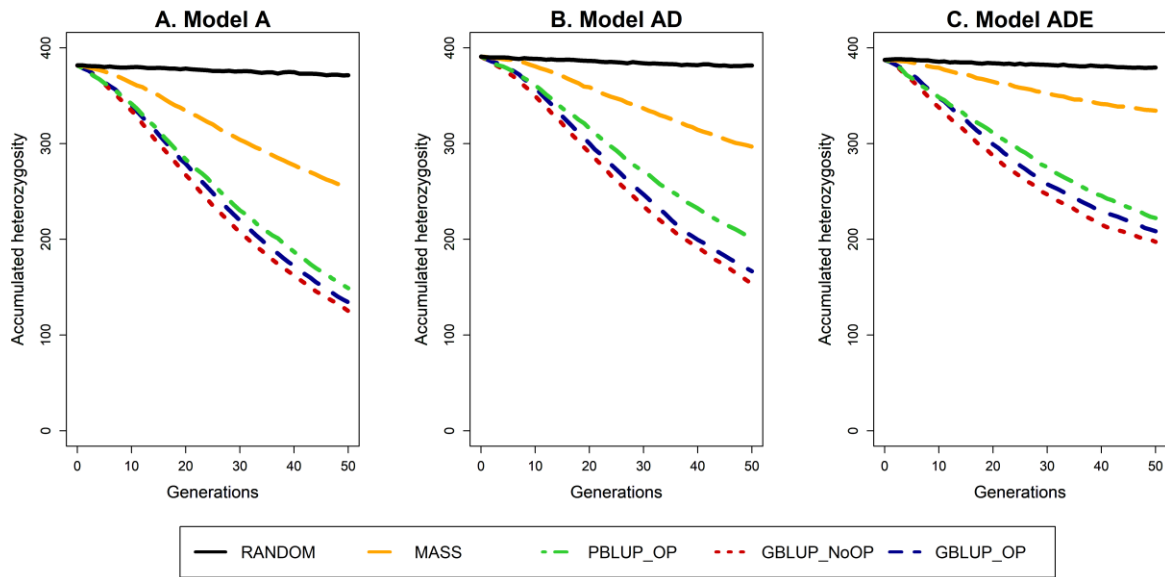

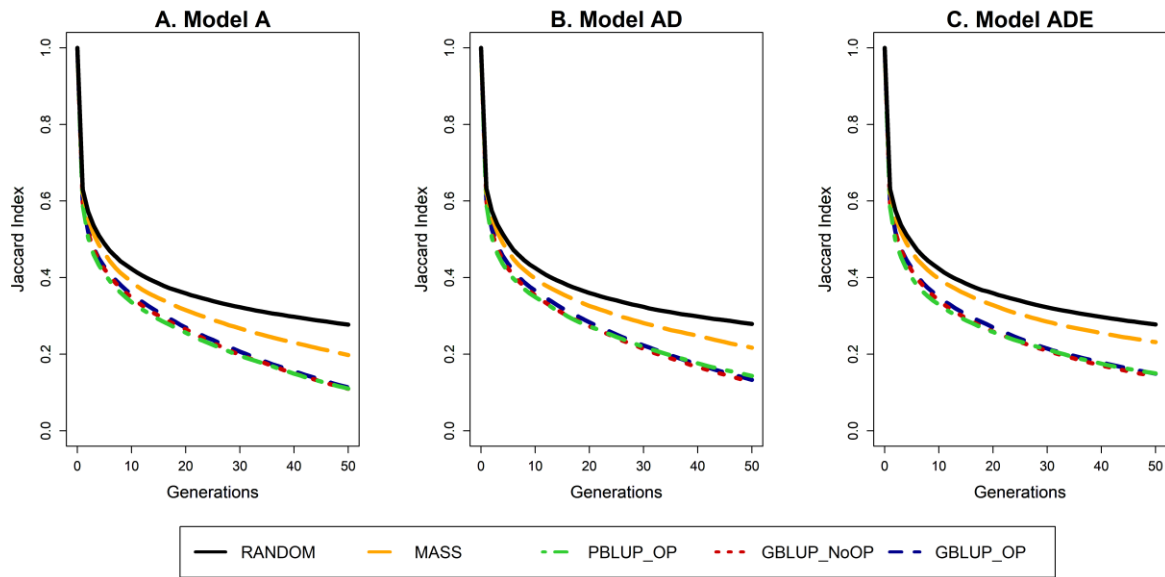

900  
901 **FIGURE 8**

902 Change in the subset of segregating causal loci for the five selection methods and three  
903 genetic models. The change in the subset is described by the Jaccard index. The five selection  
904 methods were: RANDOM selection, MASS selection, PBLUP selection with own  
905 performance (PBLUP\_OP), GBLUP selection without own performance (GBLUP\_NoOP) or  
906 with own performance (GBLUP\_OP). The three genetic models were a model with only  
907 additive effects (A), with additive and dominance effects (AD), or with additive, dominance  
908 and epistatic effects (ADE). Results are shown as averages of 20 replicates.

909

910

911

912

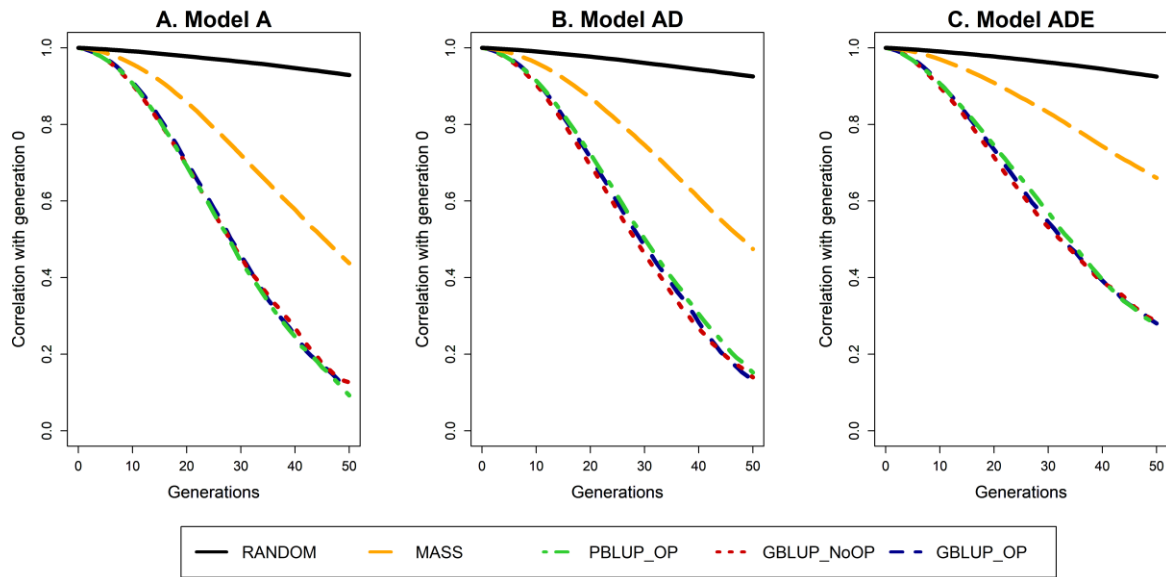

913  
914 **FIGURE 9**

915 Change in the allele frequencies of segregating causal loci for the five selection methods and  
916 three genetic models. The change in allele frequencies is represented by the correlation in  
917 allele frequencies between the generation of interest and the generation before selection  
918 (generation 0). The five selection methods were: RANDOM selection, MASS selection,  
919 PBLUP selection with own performance (PBLUP\_OP), GBLUP selection without own  
920 performance (GBLUP\_NoOP) or with own performance (GBLUP\_OP). The three genetic  
921 models were a model with only additive effects (A), with additive and dominance effects  
922 (AD), or with additive, dominance and epistatic effects (ADE). Results are shown as averages  
923 of 20 replicates.

924

925

926



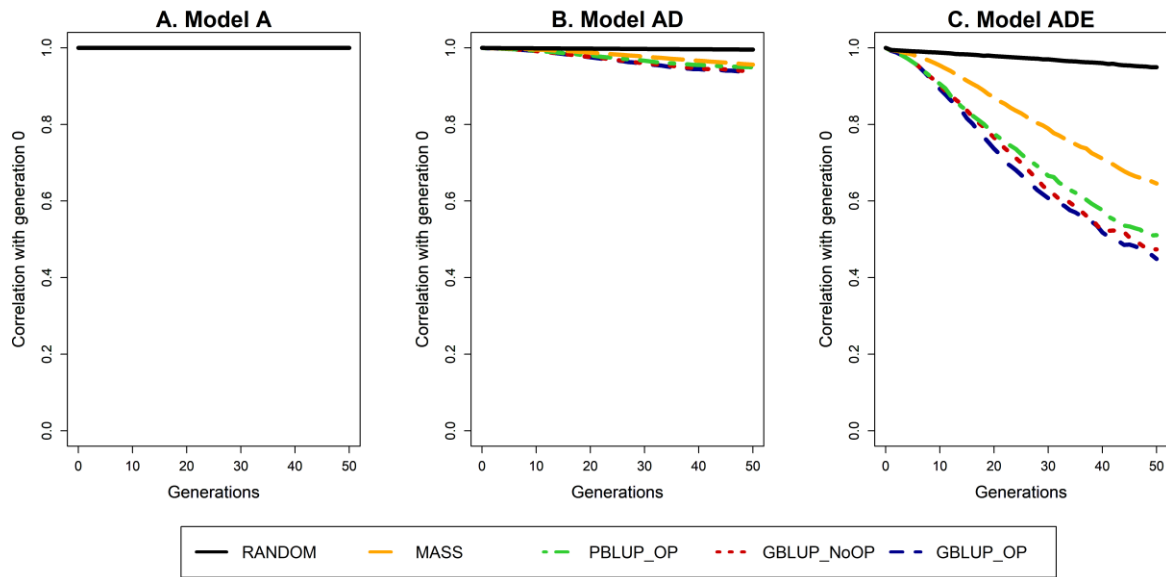

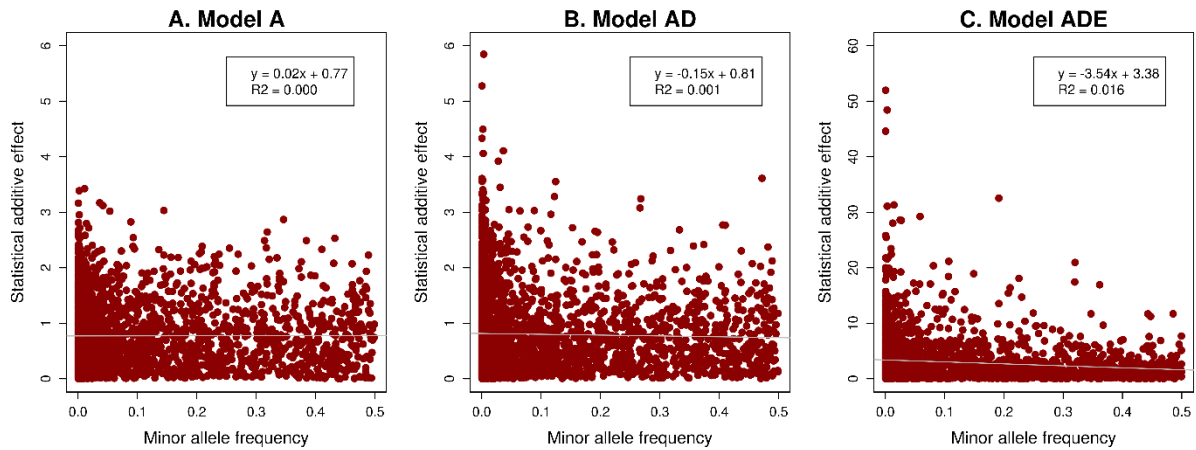

943

944 **FIGURE 11**

945 Correlation between the absolute statistical additive effect and minor allele frequency at  
946 causal loci for the three genetic models. The three genetic models were a model with only  
947 additive effects (A), with additive and dominance effects (AD), or with additive, dominance  
948 and epistatic effects (ADE).

949

950

951

952

953

**TABLES**

954

955 **TABLE 1** – Simulated epistatic model for two-locus interactions<sup>1</sup>

|                  |    | Genotype Locus B               |                                |                                |
|------------------|----|--------------------------------|--------------------------------|--------------------------------|
|                  |    | BB                             | Bb                             | bb                             |
| Genotype Locus A | AA | $e_{00} = \mu + a_A + a_B + k$ | $e_{01} = \mu + a_A + d_B + m$ | $e_{02} = \mu + a_A - a_B - k$ |
|                  | Aa | $e_{10} = \mu + d_A + a_B + l$ | $e_{11} = \mu + d_A + d_B + n$ | $e_{12} = \mu + d_A - a_B - l$ |
|                  | aa | $e_{20} = \mu - a_A + a_B - k$ | $e_{21} = \mu - a_A + d_B - m$ | $e_{22} = \mu - a_A - a_B + k$ |

956 <sup>1</sup> First, nine epistatic effects ( $e_{00} - e_{22}$ ) were simulated randomly, by sampling for each effect

957 an epistatic degree ( $\varepsilon$ ) from a normal distribution and scaling them by the additive effects of

958 the two loci (i.e.,  $e_{00} = \varepsilon_{00} \sqrt{|a_i a_j|}$ ). Then, those nine epistatic effects were used to estimate

959 the separate functional additive ( $a_A$  and  $a_B$ ), dominance ( $d_A$  and  $d_B$ ), additive by additive ( $k$ ),

960 additive by dominance ( $l$  and  $m$ ) and dominance by dominance ( $n$ ) epistatic effects that were

961 underlying those epistatic effects.

962

963 **Table 2** – Summary table of long-term effects of genomic selection

| <b>Long-term effects of genomic selection on:</b>             | <b>Simulation results</b>                                                                                                                                                                                                                                                                                                                                                                                                           | <b>Likely or proven mechanisms</b>                                                                                                                                                                                                                                                                                                                                                                                                                                                                                                                                                                                                                                                                                                                                                                                                                                 |
|---------------------------------------------------------------|-------------------------------------------------------------------------------------------------------------------------------------------------------------------------------------------------------------------------------------------------------------------------------------------------------------------------------------------------------------------------------------------------------------------------------------|--------------------------------------------------------------------------------------------------------------------------------------------------------------------------------------------------------------------------------------------------------------------------------------------------------------------------------------------------------------------------------------------------------------------------------------------------------------------------------------------------------------------------------------------------------------------------------------------------------------------------------------------------------------------------------------------------------------------------------------------------------------------------------------------------------------------------------------------------------------------|
| <b>Rate of genetic gain (Figure 3)</b>                        | <ul style="list-style-type: none"> <li>• Large drop in rate of genetic gain over generations</li> <li>• Epistasis increased the drop in rate of genetic gain over generations</li> <br/> <li>• Higher rate of genetic gain with genomic selection than with pedigree selection</li> </ul>                                                                                                                                           | <ul style="list-style-type: none"> <li>• Loss in additive genetic variance and reduction in accuracy</li> <li>• Epistasis reduced the informativeness of previous generations for breeding value estimation, and increased the level of inbreeding depression</li> <li>• Accuracy of breeding value estimation is higher with genomic selection than pedigree selection</li> </ul>                                                                                                                                                                                                                                                                                                                                                                                                                                                                                 |
| <b>Loss in additive genetic variance (Figure 4)</b>           | <ul style="list-style-type: none"> <li>• First generations: Large drop in additive genetic variance, smaller drop in additive genetic variance</li> <li>• Later generations: Large drop in additive genetic and genetic variance</li> <br/> <li>• Epistasis reduced the loss in additive genetic variance</li> <br/> <li>• Similar loss in additive genetic variance with genomic selection than with pedigree selection</li> </ul> | <ul style="list-style-type: none"> <li>• Bulmer effect, resulting in transient loss in additive genetic variance due to negative covariances between loci</li> <li>• Reduction in the number of segregating loci, because of fixation of alleles due to selection and losing rare favorable alleles as a result of shrinking estimated effects of rare loci towards zero. Moreover, the average heterozygosity level reduced due to selection.</li> <li>• Epistasis resulted in fixing a lower number of loci, because the pressure and direction of selection at a locus can change over generations due to changing statistical additive effects</li> <li>• Genomic selection maintained more segregating loci, but each of them with a lower MAF than pedigree selection, probably because pedigree selection results in a stronger family selection</li> </ul> |
| <b>Change in genetic architecture of traits (Figure 8-10)</b> | <ul style="list-style-type: none"> <li>• Large change in genetic architecture</li> <br/> <li>• Epistasis reduced the change in subset of loci and allele frequencies, but increased the change in statistical additive effects</li> <br/> <li>• Subtle differences in change in genetic architecture between pedigree and genomic selection</li> </ul>                                                                              | <ul style="list-style-type: none"> <li>• Selection changes the allele frequencies of causal loci, thereby changing the subset of segregating causal loci and their statistical additive effects</li> <li>• When epistasis was present, statistical additive effects of causal loci changed across generations, which lowered the change in allele frequency because the pressure and direction of selection at a locus changed across generations</li> <li>• Genomic selection focused more on a subset of genes that change rapidly, but the average change in allele frequency was similar for genomic and pedigree selection</li> </ul>                                                                                                                                                                                                                         |

964 **TABLE 3** – Correlation of true breeding values (TBV) of individuals from generation 50  
965 between performance in generation 50 and each of the three previous generations.

|                   | <b>Correlation in TBV of generation 50 with</b> |                      |                      |
|-------------------|-------------------------------------------------|----------------------|----------------------|
|                   | <b>Generation 49</b>                            | <b>Generation 48</b> | <b>Generation 47</b> |
| <i>Model A</i>    |                                                 |                      |                      |
| <b>RANDOM</b>     | 1.00                                            | 1.00                 | 1.00                 |
| <b>MASS</b>       | 1.00                                            | 1.00                 | 1.00                 |
| <b>PBLUP</b>      | 1.00                                            | 1.00                 | 1.00                 |
| <b>GBLUP_NoOP</b> | 1.00                                            | 1.00                 | 1.00                 |
| <b>GBLUP_OP</b>   | 1.00                                            | 1.00                 | 1.00                 |
| <i>Model AD</i>   |                                                 |                      |                      |
| <b>RANDOM</b>     | 1.00                                            | 1.00                 | 1.00                 |
| <b>MASS</b>       | 1.00                                            | 1.00                 | 1.00                 |
| <b>PBLUP</b>      | 1.00                                            | 0.99                 | 0.99                 |
| <b>GBLUP_NoOP</b> | 1.00                                            | 0.99                 | 0.99                 |
| <b>GBLUP_OP</b>   | 1.00                                            | 0.99                 | 0.99                 |
| <i>Model ADE</i>  |                                                 |                      |                      |
| <b>RANDOM</b>     | 0.99                                            | 0.99                 | 0.99                 |
| <b>MASS</b>       | 0.98                                            | 0.98                 | 0.97                 |
| <b>PBLUP</b>      | 0.95                                            | 0.92                 | 0.90                 |
| <b>GBLUP_NoOP</b> | 0.96                                            | 0.91                 | 0.86                 |
| <b>GBLUP_OP</b>   | 0.95                                            | 0.91                 | 0.87                 |

966

967
